# Supplementary material
Source: publisher figshare collection journal article supplement (https://acs.figshare.com/ndownloader/files/21655461)
Supplement: Supplementary file 1 [file 21655461]

# Combined Force-Frequency Sampling for Simulation of Systems Having Rugged Free Energy Landscapes

Emre Sevgen,<sup>†</sup> Ashley Guo,<sup>†</sup> Hythem Sidky,<sup>†</sup> Jonathan K. Whitmer,<sup>‡</sup> and Juan J. de Pablo<sup>\*,†,¶</sup>

<sup>†</sup> *Pritzker School of Molecular Engineering, University of Chicago, Chicago, Illinois 60637, USA*

<sup>‡</sup> *Department of Chemical and Biomolecular Engineering, University of Notre Dame, Notre Dame, IN 46556*

<sup>¶</sup> *Materials Science Division, Argonne National Laboratory, Argonne, IL 60439*

E-mail: depablo@uchicago.edu

## 1 Supplemental Information

### 1.1 Two-Dimensional Plots of Polymer Diffusion Through a Pore

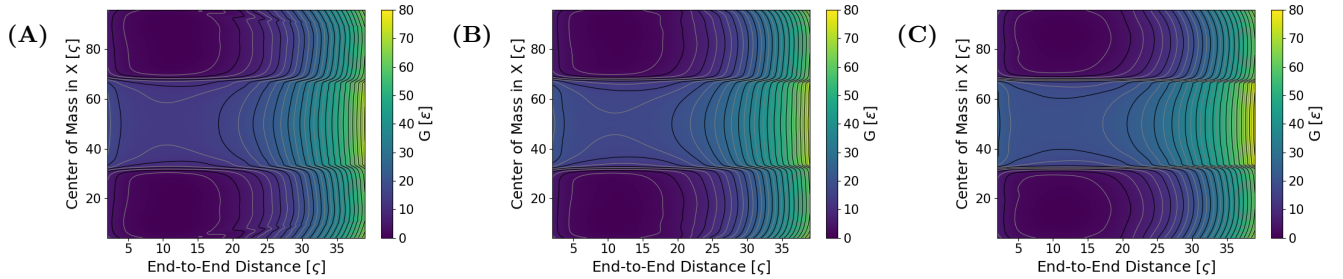

Figure 1: Free energy surfaces for a 50-bead Kremer-Grest polymer diffusing through a pore of A) 10x10, B) 8x8 and C) 6x6 at  $5.0 \times 10^6$  LJ timesteps, with the two collective variables defined as the center of mass of the polymer in the pore dimension and end-to-end distance of the polymer.
